# Supplementary material for: A biomimetic anti-biofouling coating in nanofluidic channels
Source: Royal Society of Chemistry journal article supplement (doi:10.1039/d1tb02627e), 2022-01-01
Supplement: d1tb02627e1.pdf [file d1tb02627e1.pdf]

## Electronic Supplementary Information (ESI)

### **A biomimetic anti-biofouling coating in nanofluidic channels**

*Sumire Fukuda<sup>ab‡</sup> and Yan Xu<sup>\*acd</sup>*

<sup>a</sup> Department of Chemical Engineering, Graduate School of Engineering, Osaka Prefecture University, 1-2, Gakuen-cho, Naka-ku, Sakai, Osaka 599-8570, Japan

<sup>b</sup> Department of Chemistry, Graduate School of Science, Osaka Prefecture University, 1-1, Gakuen-cho, Naka-ku, Sakai, Osaka 599-8531, Japan

<sup>c</sup> Japan Science and Technology Agency (JST), PRESTO, 4-1-8 Honcho, Kawaguchi, Saitama 332-0012, Japan

<sup>d</sup> NanoSquare Research Institute, Research Center for the 21st Century, Organization for Research Promotion, Osaka Prefecture University, 1-2, Gakuen-cho, Naka-ku, Sakai, Osaka 599-8570, Japan

\* Corresponding author: Y. Xu (xu@chemeng.osakafu-u.ac.jp)

‡ Current affiliation: S. Fukuda, School of Medicine, Kobe University, 7-5-1, Kusunoki-cho, Chuo-ku, Kobe, Hyogo 650-0017, Japan

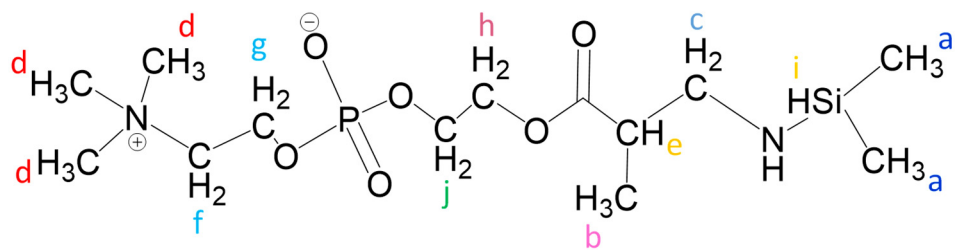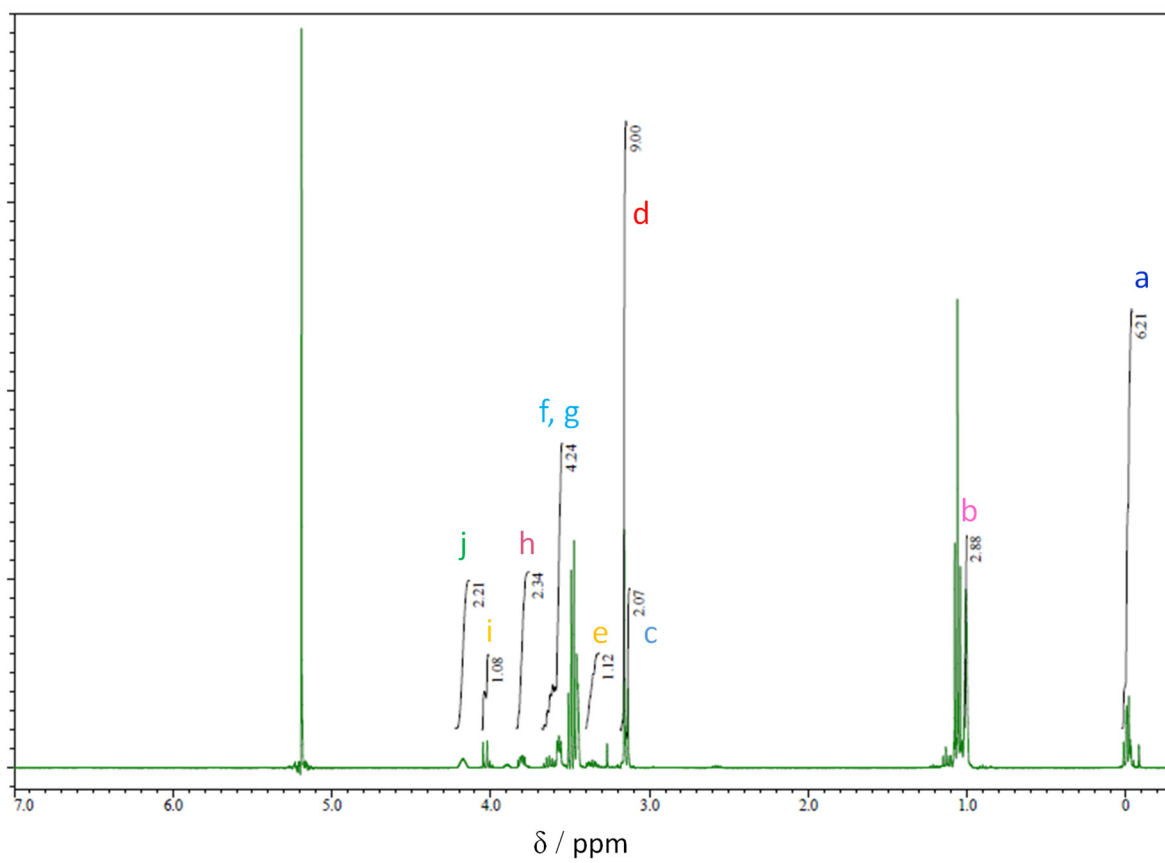

**Fig. S1**  $^1\text{H}$  NMR spectra of MPC-Si
